# Supplementary material
Source: PubMed Central journal article supplement (PMC4509568)
Supplement: NIHMS493761-supplement-01.pdf [file NIHMS493761-supplement-01.pdf]

## SUPPLEMENTAL TABLES

**Supplemental Table 1: Panel of inflammatory mediator proteins investigated in this study.**

| Abbrev.     | Full Protein Name                                   | UniProt # | Abbrev.      | Full Protein Name                                 | UniProt # |
|-------------|-----------------------------------------------------|-----------|--------------|---------------------------------------------------|-----------|
| EGF         | Epidermal Growth Factor                             | P01133    | IL-5         | Interleukin-5                                     | P05113    |
| 6Ckine      | Chemokine with 6 cysteines                          | O00585    | IL-6         | Interleukin-6                                     | P05231    |
| BCA-1       | B cell-attracting chemokine 1                       | O43927    | IL-7         | Interleukin-7                                     | P13232    |
| b-NGF       | Beta-nerve growth factor                            | P01138    | IL-8         | Interleukin-8                                     | P10145    |
| CTACK       | Cutaneous T-cell-attracting chemokine               | Q9Y4X3    | IL-9         | Interleukin-9                                     | P15248    |
| CXCL6       | C-X-C motif chemokine ligand 6                      | P80162    | IP-10        | 10 kDa interferon gamma-induced protein           | P02778    |
| ENA-78      | Epithelial-derived neutrophil-activating protein 78 | P42830    | I-TAC        | Interferon-inducible T-cell alpha chemoattractant | O14625    |
| Eotaxin     | Eosinophil chemotactic protein                      | P51671    | LIF          | Leukemia inhibitory factor                        | P15018    |
| Eotaxin-2   | Eosinophil chemotactic protein 2                    | O00175    | Lymphotactin | Lymphotactin                                      | P47992    |
| Eotaxin-3   | Eosinophil chemotactic protein 2                    | Q9Y258    | MCP-1        | Monocyte chemotactic protein 1                    | P13500    |
| FGF-basic   | Basic fibroblast growth factor 2                    | P09038    | MCP-2        | Monocyte chemotactic protein 2                    | P80075    |
| Flt-3L      | Fms-related tyrosine kinase 3 ligand                | P49771    | MCP-3        | Monocyte chemotactic protein 3                    | P80098    |
| Fractalkine | Fractalkine                                         | P78423    | MCP-4        | Monocyte chemotactic protein 4                    | Q99616    |
| G-CSF       | Granulocyte colony-stimulating factor               | P09919    | M-CSF        | Macrophage colony-stimulating factor 1            | P09603    |
| GM-CSF      | Granulocyte-macrophage colony-stimulating factor    | P04141    | MDC          | Macrophage-derived chemokine                      | O00626    |
| GRO         | Growth-regulated protein beta                       | P19875    | MIF          | Macrophage migration inhibitory factor            | P14174    |
| GRO-a       | Growth-regulated protein alpha                      | P09341    | MIG          | Monokine induced by interferon-gamma              | Q07325    |
| HCC-1       | C-C motif chemokine 14                              | Q16627    | MIP-1a       | Macrophage inflammatory protein 1-alpha           | P10147    |
| HGF         | Hepatocyte growth factor                            | P14210    | MIP-1b       | Macrophage inflammatory protein 1-beta            | P13236    |
| I-309       | T lymphocyte-secreted protein I-309                 | P22362    | MIP-1d       | Macrophage inflammatory protein delta             | Q16663    |
| ICAM-1      | Intercellular adhesion molecule 1                   | P05362    | MIP-3a       | Macrophage inflammatory protein 3-alpha           | P78556    |
| IFN-a2      | Interferon alpha-2protein                           | Q6DJX8    | MIP-3b       | Macrophage inflammatory protein 3-beta            | Q99731    |
| IFN-g       | Interferon gamma                                    | P01579    | NAP-2        | Nucleosome assembly protein 2                     | Q99733    |
| IL-10       | Interleukin-10                                      | P22301    | PDGF-AA      | Platelet-derived growth factor subunit A          | P04085    |
| IL-11       | Interleukin-11                                      | P28089    | PDGF-AB/BB   | Platelet-derived growth factor subunit A and B    | P04085    |
| IL-12p40    | Interleukin-12 subunit                              | Q8NOX8    | PDGF-BB      | Platelet-derived growth factor subunit B          | P01127    |
| IL-12p70    | Interleukin-12 subunit                              | Q8NOX8    | Rantes       | Rantes                                            | P13501    |
| IL-13       | Interleukin-13                                      | P35225    | sCD40L       | Cluster of Differentiation-40 ligand              | P29965    |
| IL-15       | Interleukin-15                                      | P40933    | SCF          | Stem cell factor                                  | P21583    |
| IL-16       | Interleukin-16                                      | Q14005    | SCGF-b       | Stem cell growth factor-beta                      | Q9Y240    |
| IL-17       | Interleukin-17                                      | Q5QEX9    | SDF-1a       | Stromal cell-derived factor 1 isoform A           | P48061    |
| IL-18       | Interleukin-18                                      | Q14116    | SDF-1a+b     | Stromal cell-derived factor 1 isoform A and B     | P48061    |
| IL-1a       | Interleukin-1 alpha                                 | Q53QF9    | sIL-2Ra      | Soluble Interleukin-2 receptor subunit alpha      | P01589    |
| IL-1b       | Interleukin-1 beta                                  | P01584    | TARC         | Thymus and activation-regulated chemokine         | Q92583    |
| IL-1ra      | Interleukin-1 receptor antagonist protein           | P18510    | TGF-a        | Transforming growth factor alpha                  | P01135    |
| IL-2        | Interleukin-2                                       | P60568    | TGF-b1       | Transforming growth factor beta-1                 | P01137    |
| IL-20       | Interleukin-20                                      | Q9NYY1    | TGF-b2       | Transforming growth factor beta-2                 | P61812    |
| IL-21       | Interleukin-21                                      | Q9HBE4    | TGF-b3       | Transforming growth factor beta-3                 | P10600    |
| IL-23       | Interleukin-23                                      | Q9NPF7    | TNF-a        | Tumor necrosis factor-alpha                       | P01375    |
| IL-28A      | Interleukin-28 subunit alpha                        | Q8IZI0    | TNF-b        | Tumor necrosis factor-beta                        | P01374    |
| IL-29       | Interleukin-29                                      | Q8IU54    | TPO          | Thyroid peroxidase                                | P07202    |
| IL-3        | Interleukin-3                                       | P08700    | TRAIL        | TNF-related apoptosis-inducing ligand             | P50591    |
| IL-33       | Interleukin-33                                      | O95760    | TSLP         | Thymic stromal lymphopietin                       | Q969D9    |
| IL-4        | Interleukin-4                                       | P05112    | VCAM-1       | Vascular cell adhesion protein 1                  | P19320    |
|             |                                                     |           | VEGF         | Vascular endothelial growth factor A              | P15692    |

**Supplemental Table 2: Statistical analysis of inflammatory mediator proteins detected in fluid from both types of cysts.**

| Cytokine    | BD-IPMN              |         |         |        |        |        |         | Inflammatory cyst    |          |          |         |          |          |          | p-value |
|-------------|----------------------|---------|---------|--------|--------|--------|---------|----------------------|----------|----------|---------|----------|----------|----------|---------|
|             | Concentration, pg/ml |         |         |        |        |        |         | Concentration, pg/ml |          |          |         |          |          |          |         |
|             | Samples              |         |         |        |        | Median | IQR     | Samples              |          |          |         |          | Median   | IQR      |         |
|             | BD1                  | BD2     | BD3     | BD4    | BD5    |        |         | IC1                  | IC2      | IC3      | IC4     | PPC5     |          |          |         |
| BCA-1       | N.D.                 | N.D.    | 0.69    | N.D.   | N.D.   | 0.69   | 0.00    | N.D.                 | N.D.     | 45.74    | N.D.    | 0.71     | 23.23    | 22.52    | 0.603   |
| CXCL6       | N.D.                 | N.D.    | 32.25   | 7.41   | N.D.   | 19.83  | 12.42   | N.D.                 | N.D.     | 9.70     | N.D.    | 9.87     | 9.79     | 0.08     | 1.000   |
| EGF         | 5.94                 | 363.71  | 1305.50 | N.D.   | N.D.   | 363.71 | 649.78  | N.D.                 | N.D.     | 12.92    | 10.34   | 1116.05  | 12.92    | 552.86   | 1.000   |
| Eotaxin     | 2.79                 | 18.59   | 18.16   | 8.63   | N.D.   | 13.40  | 11.10   | 26.73                | N.D.     | 38.31    | 20.99   | 268.77   | 32.52    | 70.63    | 0.067   |
| Eotaxin-2   | 13.74                | 36.00   | 1741.83 | 8.00   | 117.89 | 36.00  | 104.15  | N.D.                 | N.D.     | 72.26    | 86.17   | 265.74   | 86.17    | 96.74    | 0.570   |
| FGF-basic   | N.D.                 | 54.46   | 39.77   | N.D.   | N.D.   | 47.12  | 7.35    | N.D.                 | N.D.     | 33.52    | N.D.    | 171.65   | 102.59   | 69.07    | 1.000   |
| FIt-3L      | N.D.                 | 3.44    | N.D.    | N.D.   | N.D.   | 3.44   | 0.00    | 32.31                | 81.68    | 32.05    | N.D.    | 4.42     | 32.18    | 19.51    | 0.349   |
| Fractalkine | 26.03                | 46.22   | 168.24  | 26.03  | 214.02 | 46.22  | 142.21  | 62.80                | 26.03    | 90.99    | 26.03   | 137.73   | 62.80    | 64.96    | 0.834   |
| G-CSF       | N.D.                 | 2.11    | 6.56    | 2.49   | N.D.   | 2.49   | 2.23    | 5.59                 | 2.85     | 399.95   | 2.11    | 27.22    | 5.59     | 24.37    | 0.478   |
| GRO         | N.D.                 | 50.16   | 658.12  | 15.91  | 15.91  | 33.04  | 186.24  | 42.90                | 13.13    | 340.65   | 15.91   | 672.65   | 42.90    | 324.74   | 1.000   |
| GRO-a       | N.D.                 | 24.60   | 312.44  | 7.79   | 7.77   | 16.20  | 88.78   | 22.41                | 6.78     | 169.83   | 7.92    | 329.97   | 22.41    | 161.91   | 0.906   |
| HCC-1       | N.D.                 | 171.80  | 818.71  | N.D.   | 39.24  | 171.80 | 389.74  | N.D.                 | 587.15   | 2563.74  | N.D.    | 1649.27  | 1649.27  | 988.30   | 0.247   |
| HGF         | 27.81                | 144.11  | 474.27  | 20.32  | 12.61  | 27.81  | 123.79  | 14657.23             | 5189.26  | 8639.81  | 1918.98 | 1613.07  | 5189.26  | 6720.83  | 0.034   |
| ICAM-1      | 276.58               | 4492.48 | 5375.65 | 276.58 | 259.02 | 276.58 | 4215.90 | 162.27               | 20130.18 | 18894.42 | 1591.32 | 31651.21 | 18894.42 | 18538.86 | 0.322   |
| IFN-a2      | N.D.                 | N.D.    | 12.93   | N.D.   | N.D.   | 12.93  | 0.00    | N.D.                 | N.D.     | 16.28    | 11.10   | 11.35    | 11.35    | 2.59     | 1.000   |
| IFN-g       | N.D.                 | 2.33    | 1.11    | 1.42   | N.D.   | 1.42   | 0.61    | 1.44                 | 3.75     | 61.26    | 2.77    | 4.51     | 3.75     | 1.74     | 0.117   |
| IL-10       | 0.15                 | 1.88    | 2.92    | N.D.   | N.D.   | 1.88   | 1.39    | 1.88                 | 21.48    | 11.38    | 1.45    | 6.28     | 6.28     | 9.50     | 0.329   |
| IL-12p40    | N.D.                 | 17.45   | 7.04    | N.D.   | N.D.   | 12.25  | 5.21    | 19.84                | 38.74    | 26.71    | 50.50   | 24.91    | 26.71    | 13.83    | 0.132   |
| IL-12p70    | N.D.                 | N.D.    | 2.01    | N.D.   | N.D.   | 2.01   | 0.00    | 0.88                 | N.D.     | 1.59     | N.D.    | 0.74     | 0.88     | 0.43     | 0.437   |
| IL-13       | N.D.                 | 12.18   | 5.50    | N.D.   | N.D.   | 8.84   | 3.34    | 7.47                 | 11.28    | 5.85     | 4.40    | 6.52     | 6.52     | 1.62     | 0.853   |
| IL-15       | N.D.                 | 7.36    | N.D.    | N.D.   | N.D.   | 7.36   | 0.00    | 5.29                 | 5.63     | 16.17    | 6.40    | 13.69    | 6.40     | 8.06     | 1.000   |
| IL-16       | 7.28                 | 11.79   | 28.12   | 20.19  | 2.38   | 11.79  | 12.91   | 7.28                 | 11.79    | 7.28     | N.D.    | 16.07    | 9.54     | 5.58     | 0.809   |
| IL-18       | N.D.                 | 18.39   | 91.96   | N.D.   | N.D.   | 55.18  | 36.79   | N.D.                 | 26.61    | 26.89    | N.D.    | 7.20     | 26.61    | 9.85     | 0.787   |
| IL-1a       | N.D.                 | 7.36    | 12.47   | N.D.   | N.D.   | 9.92   | 2.56    | 10.05                | 23.09    | 57.10    | 10.31   | 28.61    | 23.09    | 18.30    | 0.370   |
| IL-1b       | N.D.                 | 0.97    | N.D.    | N.D.   | N.D.   | 0.97   | 0.00    | 1.85                 | 7.96     | 17.60    | 2.86    | 1.85     | 2.86     | 6.11     | 0.288   |
| IL-1ra      | N.D.                 | 13.27   | 379.73  | N.D.   | N.D.   | 196.50 | 183.23  | 20.05                | 985.00   | 116.00   | 3.26    | 31.76    | 31.76    | 95.95    | 1.000   |
| IL-2        | N.D.                 | 1.17    | 2.12    | N.D.   | N.D.   | 1.65   | 0.48    | 0.93                 | N.D.     | 4.98     | 0.68    | 2.07     | 1.50     | 1.93     | 0.826   |
| IL-21       | N.D.                 | 4.14    | N.D.    | N.D.   | N.D.   | 4.14   | 0.00    | N.D.                 | N.D.     | 3.12     | N.D.    | N.D.     | 3.12     | 0.00     | N.A.    |
| IL-23       | N.D.                 | 18.29   | 30.16   | N.D.   | N.D.   | 24.23  | 5.94    | 177.12               | 24.23    | 18.29    | 24.23   | 36.08    | 24.23    | 11.85    | 0.707   |
| IL-3        | N.D.                 | 8.45    | N.D.    | 2.60   | N.D.   | 5.53   | 2.93    | 8.81                 | N.D.     | 14.56    | 28.39   | 26.40    | 20.48    | 13.78    | 0.166   |
| IL-33       | N.D.                 | N.D.    | 16.29   | N.D.   | N.D.   | 16.29  | 0.00    | N.D.                 | 3.94     | N.D.     | N.D.    | N.D.     | 3.94     | 0.00     | N.A.    |
| IL-4        | N.D.                 | 2.20    | 0.71    | 16.52  | N.D.   | 2.20   | 7.91    | 70.30                | 4.60     | 248.12   | 21.78   | 43.55    | 43.55    | 48.52    | 0.117   |
| IL-6        | N.D.                 | 5.38    | 21.87   | N.D.   | N.D.   | 13.63  | 8.25    | 3.51                 | 302.98   | 58962.61 | N.D.    | 326.87   | 314.93   | 14757.69 | 0.518   |
| IL-7        | N.D.                 | 3.50    | 26.95   | N.D.   | 2.67   | 3.50   | 12.14   | 1.90                 | 10.52    | 12.79    | 2.67    | 8.04     | 8.04     | 7.85     | 0.885   |
| IL-8        | 9.29                 | 7.69    | 617.69  | N.D.   | N.D.   | 9.29   | 305.00  | N.D.                 | 295.63   | 5599.38  | 43.49   | 7502.93  | 2947.51  | 5842.67  | 0.262   |
| IP-10       | 6.13                 | 24.16   | 106.03  | 4.39   | N.D.   | 15.15  | 38.93   | 59.80                | 22.34    | 71.54    | 21.96   | 26.24    | 26.24    | 37.46    | 0.557   |
| I-TAC       | N.D.                 | 0.89    | 373.70  | N.D.   | N.D.   | 187.30 | 186.41  | N.D.                 | N.D.     | N.D.     | N.D.    | 7.36     | 7.36     | 0.00     | 1.000   |
| LIF         | N.D.                 | 15.03   | N.D.    | N.D.   | N.D.   | 15.03  | 0.00    | N.D.                 | N.D.     | 432.27   | N.D.    | 58.42    | 245.35   | 186.93   | 0.603   |
| MCP-1       | 65.03                | 2591.20 | 631.63  | 2.34   | 1.02   | 65.03  | 629.29  | 5.80                 | 10729.88 | 9040.82  | 10.93   | 10892.19 | 9040.82  | 10718.95 | 0.242   |
| MCP-2       | N.D.                 | N.D.    | 5.83    | N.D.   | N.D.   | 5.83   | 0.00    | 9.64                 | N.D.     | 34.28    | N.D.    | N.D.     | 21.96    | 12.32    | 0.603   |
| MCP-3       | 4.33                 | 5.73    | 11.36   | 2.03   | 2.03   | 4.33   | 3.70    | 4.33                 | 11.36    | 182.09   | 2.03    | 23.18    | 11.36    | 18.85    | 0.549   |
| MCP-4       | N.D.                 | N.D.    | 31.84   | N.D.   | N.D.   | 31.84  | 0.00    | N.D.                 | N.D.     | 13.41    | N.D.    | 34.36    | 23.89    | 10.48    | 1.000   |
| M-CSF       | 15.39                | N.D.    | N.D.    | 14.17  | N.D.   | 14.78  | 0.61    | 39.78                | 14.17    | N.D.     | 79.40   | N.D.     | 39.78    | 32.62    | 0.586   |

|            |        |         |          |        |        |         |         |          |          |          |         |         |          |          |       |
|------------|--------|---------|----------|--------|--------|---------|---------|----------|----------|----------|---------|---------|----------|----------|-------|
| MDC        | N.D.   | 6.11    | 29.47    | N.D.   | N.D.   | 17.79   | 11.68   | 9.91     | N.D.     | 52.32    | N.D.    | 64.44   | 52.32    | 27.27    | 0.435 |
| MIF        | 162.84 | 598.59  | 12261.99 | 65.45  | 293.70 | 293.70  | 435.75  | 6.27     | 345.36   | 3852.41  | 84.86   | 272.65  | 272.65   | 260.50   | 0.686 |
| MIG        | N.D.   | 42.00   | 194.82   | N.D.   | 16.23  | 42.00   | 89.30   | N.D.     | N.D.     | N.D.     | N.D.    | 500.54  | 500.54   | 0.00     | 0.437 |
| MIP-1a     | N.D.   | 7.67    | 13.15    | N.D.   | N.D.   | 10.41   | 2.74    | 17.72    | 19.11    | 19.35    | 12.80   | 16.51   | 17.72    | 2.60     | 0.224 |
| MIP-1b     | N.D.   | 32.86   | 31.39    | N.D.   | N.D.   | 32.13   | 0.73    | 49.16    | N.D.     | 39.65    | 31.76   | 42.16   | 40.91    | 6.23     | 0.299 |
| MIP-1d     | N.D.   | N.D.    | N.D.     | N.D.   | 96.18  | 96.18   | 0.00    | N.D.     | N.D.     | 12.34    | N.D.    | 13.49   | 12.92    | 0.58     | 0.603 |
| NAP-2      | N.D.   | 2236.62 | 5415.79  | N.D.   | N.D.   | 3826.21 | 1589.59 | N.D.     | N.D.     | 981.84   | N.D.    | 2004.65 | 1493.25  | 511.41   | 0.329 |
| PDGF-AA    | 152.59 | 9544.06 | 9784.42  | 35.44  | 130.30 | 152.59  | 9413.76 | 1071.03  | 2017.84  | 9920.30  | 1073.82 | 6454.17 | 2017.84  | 5380.35  | 0.425 |
| PDGF-AB/BB | 16.23  | 279.65  | 589.22   | 31.23  | 9.67   | 31.23   | 263.42  | 264.54   | 24.31    | 156.95   | 14.56   | 433.50  | 156.95   | 240.23   | 1.000 |
| PDGF-BB    | 15.26  | 90.40   | 396.93   | 29.22  | 8.50   | 29.22   | 75.14   | 15.22    | 15.06    | 97.40    | 13.99   | 119.05  | 15.22    | 82.34    | 0.839 |
| Rantes     | 3.44   | 218.39  | 1621.09  | N.D.   | N.D.   | 218.39  | 808.83  | 1.86     | 3.21     | 84.57    | 1.74    | 167.46  | 3.21     | 82.71    | 0.180 |
| sCD40L     | N.D.   | 86.21   | 243.42   | 1.88   | N.D.   | 86.21   | 120.77  | 8.64     | 63.65    | 66.85    | 19.31   | 61.72   | 61.72    | 44.34    | 0.570 |
| SCGF-b     | 69.54  | 990.90  | 481.66   | 613.48 | N.D.   | 547.57  | 329.21  | 12715.80 | 13388.12 | 50145.29 | 425.13  | 2189.04 | 12715.80 | 11199.08 | 0.150 |
| SDF-1a     | 54.27  | 59.10   | 338.07   | 76.21  | 38.54  | 59.10   | 21.94   | 4.83     | 68.20    | 38.25    | 59.10   | 76.72   | 59.10    | 29.95    | 0.613 |
| SDF-1a+b   | N.D.   | 452.51  | 427.25   | 78.12  | N.D.   | 427.25  | 187.20  | N.D.     | 70.33    | N.D.     | 90.55   | 90.55   | 90.55    | 10.11    | 0.416 |
| siL-2Ra    | N.D.   | 7.63    | N.D.     | N.D.   | N.D.   | 7.63    | 0.00    | 8.96     | 23.98    | 301.29   | 6.10    | 10.29   | 10.29    | 15.02    | 0.584 |
| TARC       | N.D.   | 0.42    | 2.76     | N.D.   | N.D.   | 1.59    | 1.17    | N.D.     | N.D.     | 1.36     | N.D.    | 9.19    | 5.28     | 3.92     | 0.724 |
| TGF-a      | N.D.   | N.D.    | 7.25     | N.D.   | 1.30   | 4.28    | 2.98    | N.D.     | N.D.     | 0.64     | N.D.    | 0.64    | 0.64     | 0.00     | 0.308 |
| TNF-a      | N.D.   | N.D.    | 1.39     | N.D.   | N.D.   | 1.39    | 0.00    | 0.54     | 0.79     | 4.14     | 1.73    | 3.31    | 1.73     | 2.52     | 0.317 |
| TRAIL      | N.D.   | 1.97    | 49.33    | N.D.   | 51.57  | 49.33   | 24.80   | N.D.     | 2.63     | 26.33    | N.D.    | 3.52    | 3.52     | 11.85    | 0.681 |
| VCAM-1     | N.D.   | 18.71   | 555.21   | 18.12  | 18.23  | 18.47   | 134.63  | N.D.     | 5057.99  | 223.68   | N.D.    | 37.80   | 223.68   | 2510.10  | 0.262 |
| VEGF       | N.D.   | 37.32   | 650.44   | N.D.   | 13.98  | 37.32   | 318.23  | 53.39    | N.D.     | 455.99   | 13.98   | 71.60   | 62.50    | 124.16   | 1.000 |

\*: Statistically significant difference in the median concentration of a particular cytokine in BD-IPMN vs. inflammatory cyst (Wilcoxon rank-sum test,  $p < 0.05$ ).  
 \*\*: Statistically significant difference in the median concentration of a particular cytokine in BD-IPMN vs. inflammatory cyst (Wilcoxon rank-sum test,  $p < 0.1$ ).  
 N.D., not detected. N.A., not applicable.
